# Supplementary material for: Eukaryotic Initiation Factor 5B (eIF5B) Cooperates with eIF1A and eIF5 to Facilitate uORF2-Mediated Repression of ATF4 Translation
Source: PubMed Central journal article supplement (PMC6321046; doi:10.3390/ijms19124032), 2018-12-13
Supplement: ijms-19-04032-s001.pdf [file ijms-19-04032-s001.pdf]

**Table S1. qPCR primers and antibodies used in this study.**

| Target                | Primer                                    | Sequence (5' to 3') or catalogue #                 | Annealing Temp (°C) | Reference or source |
|-----------------------|-------------------------------------------|----------------------------------------------------|---------------------|---------------------|
| ATF4                  | -                                         | QuantiTect primer assay, QT00074466                | 55                  | Qiagen              |
| GADD34                | -                                         | QuantiTect primer assay, QT00013321                | 55                  |                     |
| Firefly Luciferase    | Fw<br>Rv                                  | TCGAAATGTCCGTTCCGGTTG<br>CGCAACTGCAACTCCGATAA      | 50.6                | This study          |
| β-actin               | Fw<br>Rv                                  | TCACCCACACTGTGCCCATCTACGA<br>TGAGGTAGTCAGTCAGGTCCC | 55                  | [1]                 |
| CAT                   | Fw<br>Rv                                  | GCGTGTTACGGTGAAAACCT<br>GGGCGAAGAAGTTGTCCATA       | 52                  | [2]                 |
| Company               | Antibody Target                           |                                                    | Catalogue number    |                     |
| Abcam                 | Secondary: Goat anti-rabbit-HRP conjugate |                                                    | ab97051             |                     |
| ProteinTech           | eIF5B                                     |                                                    | 13527-1-AP          |                     |
|                       | eIF2A                                     |                                                    | 11233-1-AP          |                     |
|                       | eIF5                                      |                                                    | 11155-1-AP          |                     |
| Bio-Rad               | β-actin (hFAB Rhodamine)                  |                                                    | 12004163            |                     |
| Abcam                 | GADD34                                    |                                                    | Ab126075            |                     |
|                       | eIF1A                                     |                                                    | Ab177939            |                     |
| Cell Signalling Tech. | ATF4                                      |                                                    | 11815               |                     |
|                       | eIF2α                                     |                                                    | 9722                |                     |
|                       | Phospho eIF2α                             |                                                    | 9721                |                     |

1. Khan, D.; Katoch, A.; Das, A.; Sharathchandra, A.; Lal, R.; Roy, P.; Das, S.; Chattopadhyay, S.; Das, S., Reversible induction of translational isoforms of p53 in glucose deprivation. *Cell death and differentiation* **2015**, 22, (7), 1203-18.
2. Thakor, N.; Holcik, M., IRES-mediated translation of cellular messenger RNA operates in eIF2alpha- independent manner during stress. *Nucleic acids research* **2012**, 40, (2), 541-52.

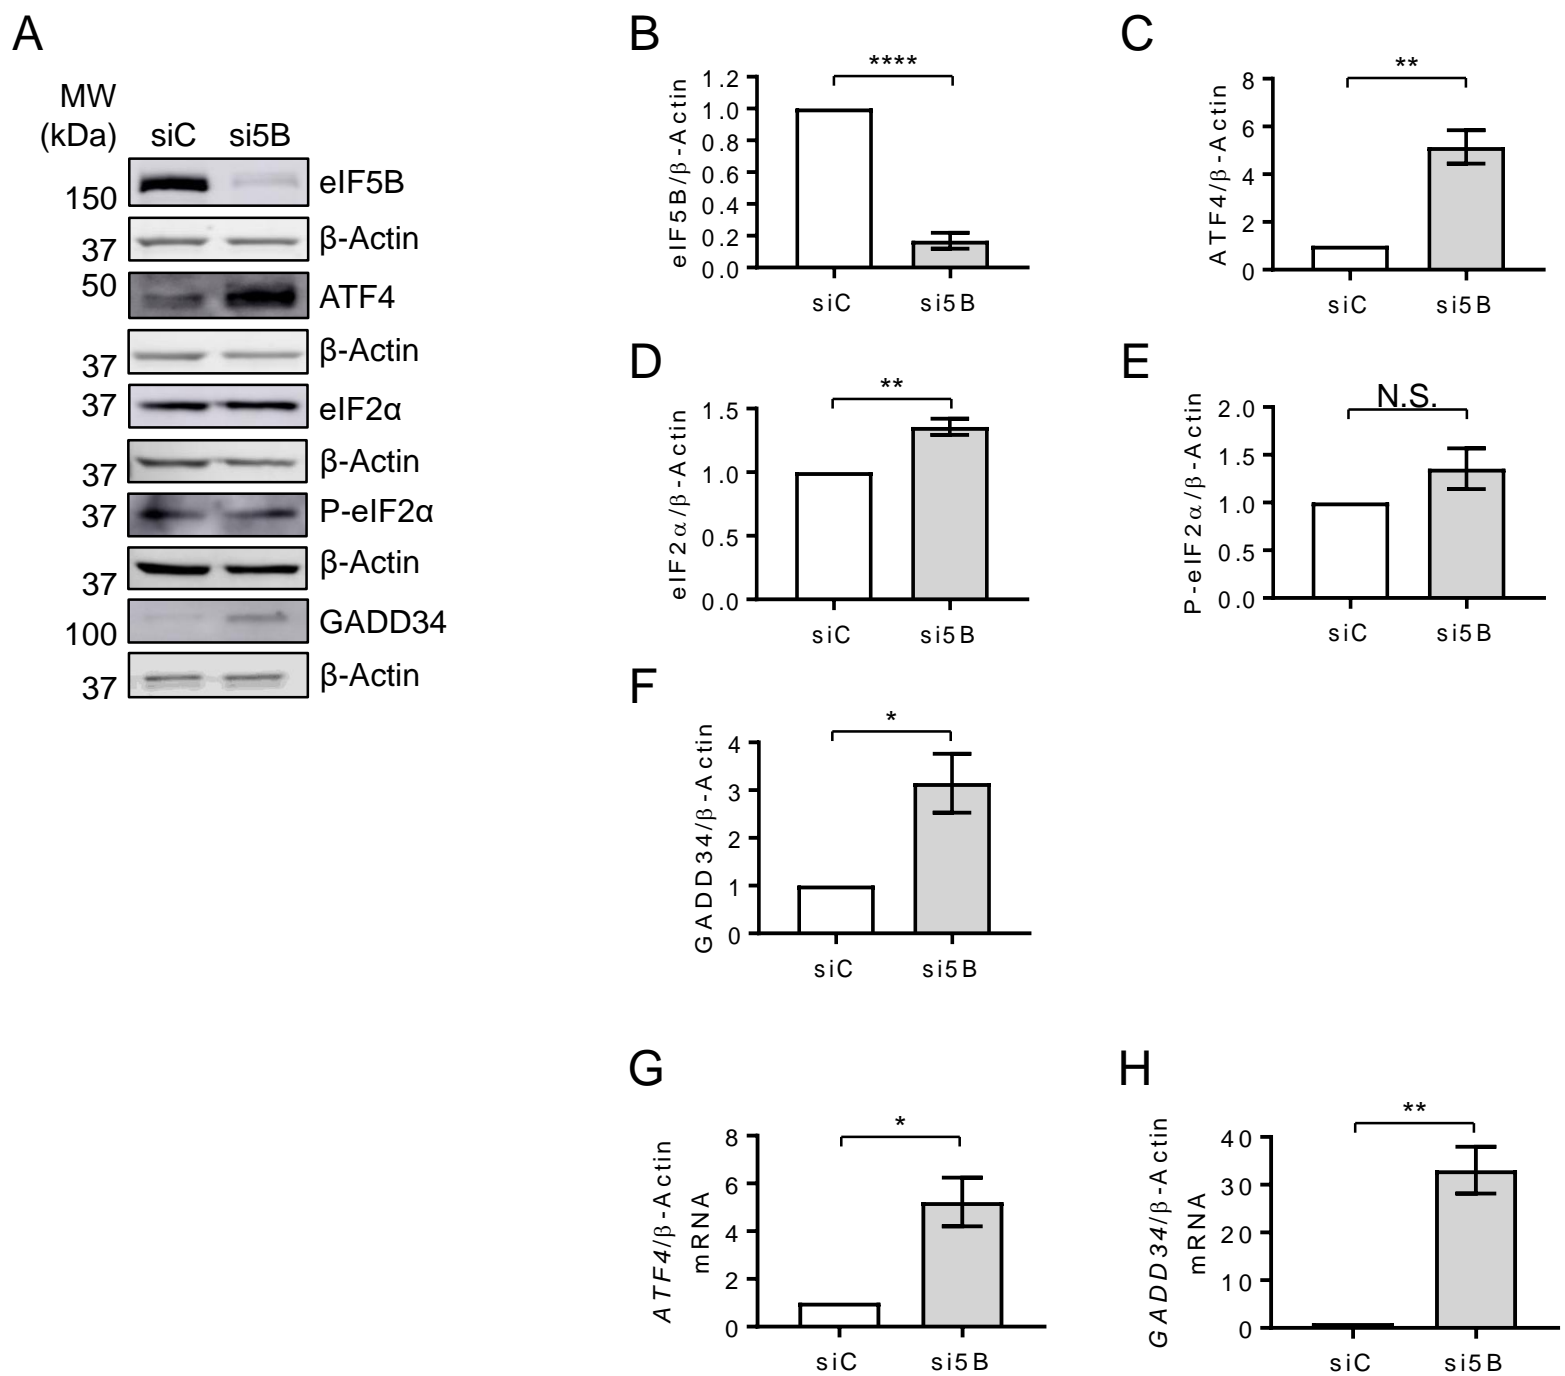

**Figure S1. Depletion of eIF5B leads to increased levels of the ATF4 protein in U2OS cells.** U2OS were reverse-transfected with a non-specific control siRNA (siC) or an eIF5B-specific siRNA pool (si5B), incubated 96 hours, harvested in RIPA lysis buffer, and 20  $\mu$ g of total protein resolved by SDS-PAGE before performing immunoblotting. **(A)** Representative images of immunoblots probing for eIF5B, ATF4, eIF2 $\alpha$ , P-eIF2 $\alpha$ , GADD34, or  $\beta$ -actin (internal control). **(B-F)** Quantitation of eIF5B **(B)**, ATF4 **(C)**, eIF2 $\alpha$  **(D)**, P-eIF2 $\alpha$  **(E)**, or GADD34 **(F)**, normalized to  $\beta$ -actin, from U2OS cells. **(G, H)** Total RNA was isolated from control or eIF5B-depleted U2OS cells and subjected to RT-qPCR analysis of steady-state mRNA levels for ATF4 **(G)** or GADD34 **(H)**, normalized to  $\beta$ -actin mRNA. Data are expressed as mean  $\pm$  SEM for at least 3 (B-E, G, H) and up to 4 (F) independent biological replicates. \*,  $p < 0.05$ ; \*\*,  $p < 0.01$ ; \*\*\*,  $P < 0.001$ ; \*\*\*\*,  $p < 0.0001$ .

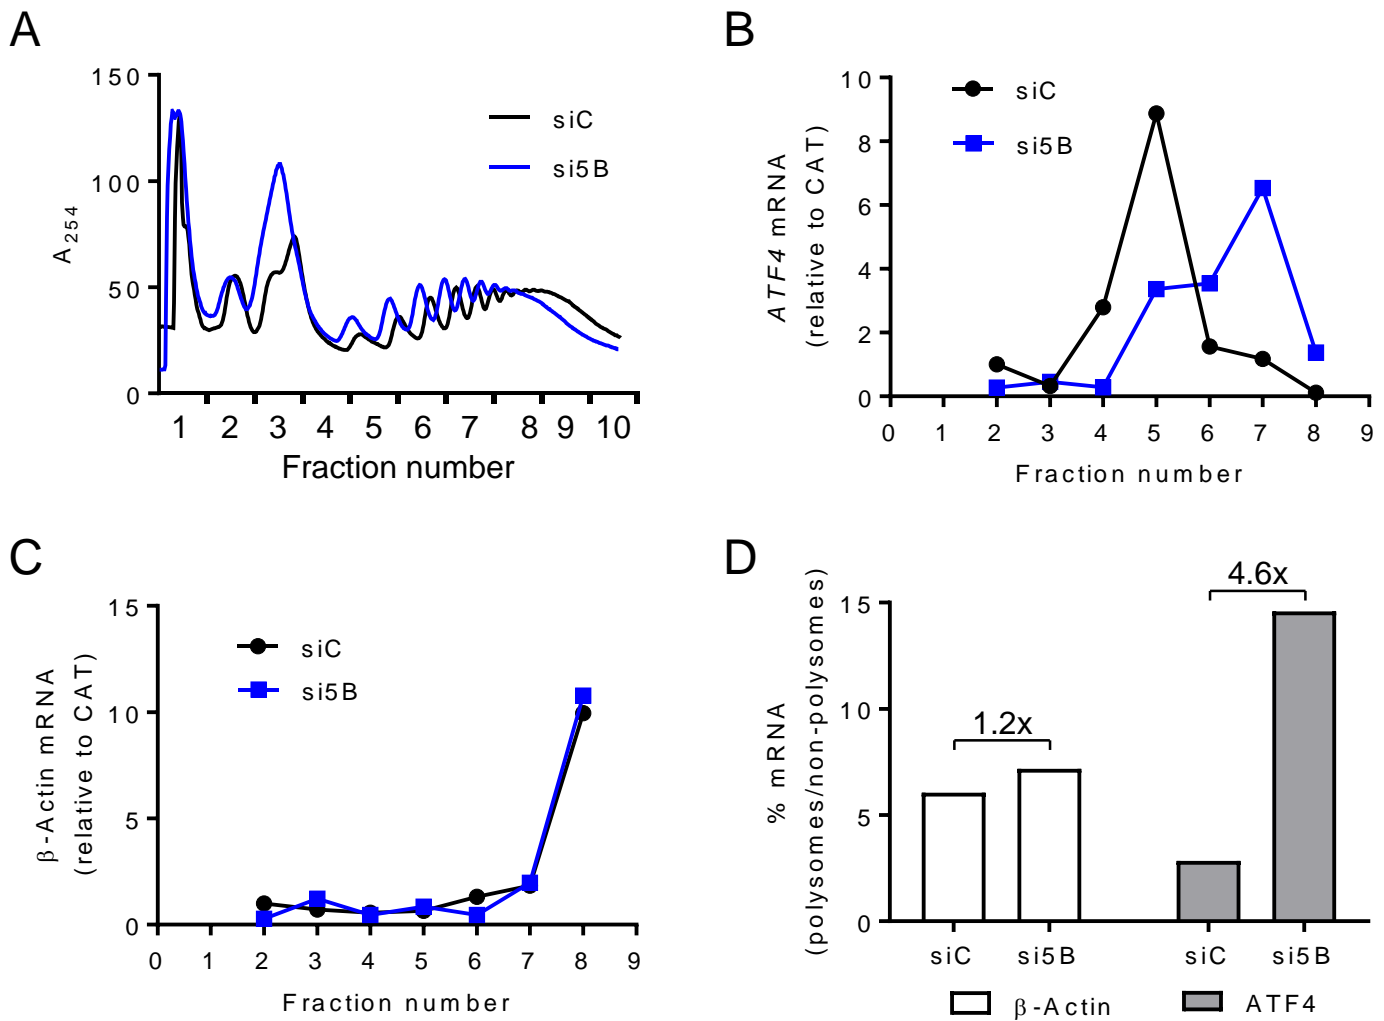

**Figure S2. Depletion of eIF5B increases translation of ATF4 in HEK293T cells (related to Figure 2).** Control and eIF5B-depleted HEK293T cells were subjected to polysome profiling analysis as described in Materials and Methods. **(A)** Polysome profile from control versus eIF5B-depleted cells. **(B)** The proportion of *ATF4* mRNA for each fraction from panel (A) was normalized to an external control RNA (chloramphenicol acetyltransferase, CAT). **(C)** The proportion of  $\beta$ -actin mRNA for each fraction from panel (A) was normalized to CAT. **(D)** Fractions 1-3 (representing monosomes) were pooled, as were fractions 4-10 (representing polysomes). The ratio of polysomes/monosomes is shown. Note that this experiment was conducted by N. Thakor at the Children's Hospital of Eastern Ontario (CHEO) in 2012 and thus constitutes a totally independent replicate from that shown in Figure 2.
